# Supplementary material
Source: Springer Nature journal article supplement (https://www.springermedizin.de/resource/supplementary/12875_2009_368_MOESM1_ESM.pdf/9434464)
Supplement: MOESM1 [file 9434464]

Family Physicians/General Practitioners from London, Toronto, and Ottawa who were in the databases  
1065

230  
Unable to be reached

Family Physicians/General Practitioners who were successfully contacted by phone  
835

239  
Non-office based (Hospital, ER, locums, etc)

Family Physicians/General Practitioners who were in office based practice  
596

84  
Office based but no well-baby care

Family Physicians/General Practitioners who do well-baby care  
512

RBR Users  
402

Non RBR Structured Forms  
38

No structured forms  
72

Questionnaire to random sample of 100

Respondents  
41

20 were successfully contacted, eligible and agreed to participate from first random 49 of 402 RBR users

18 were successfully contacted, eligible and agreed to participate from entire group of 72 RBR non-users

**Part 1**

**Part 2**
